# Supplementary material for: Quantitative determination of flavins – complex analyte/matrix effects in the presence of food colour additives
Source: Royal Society of Chemistry journal article supplement (doi:10.1039/c3ay40077h), 2013-01-01
Supplement: c3ay40077h.pdf [file c3ay40077h.pdf]

## SUPPORTING INFORMATION

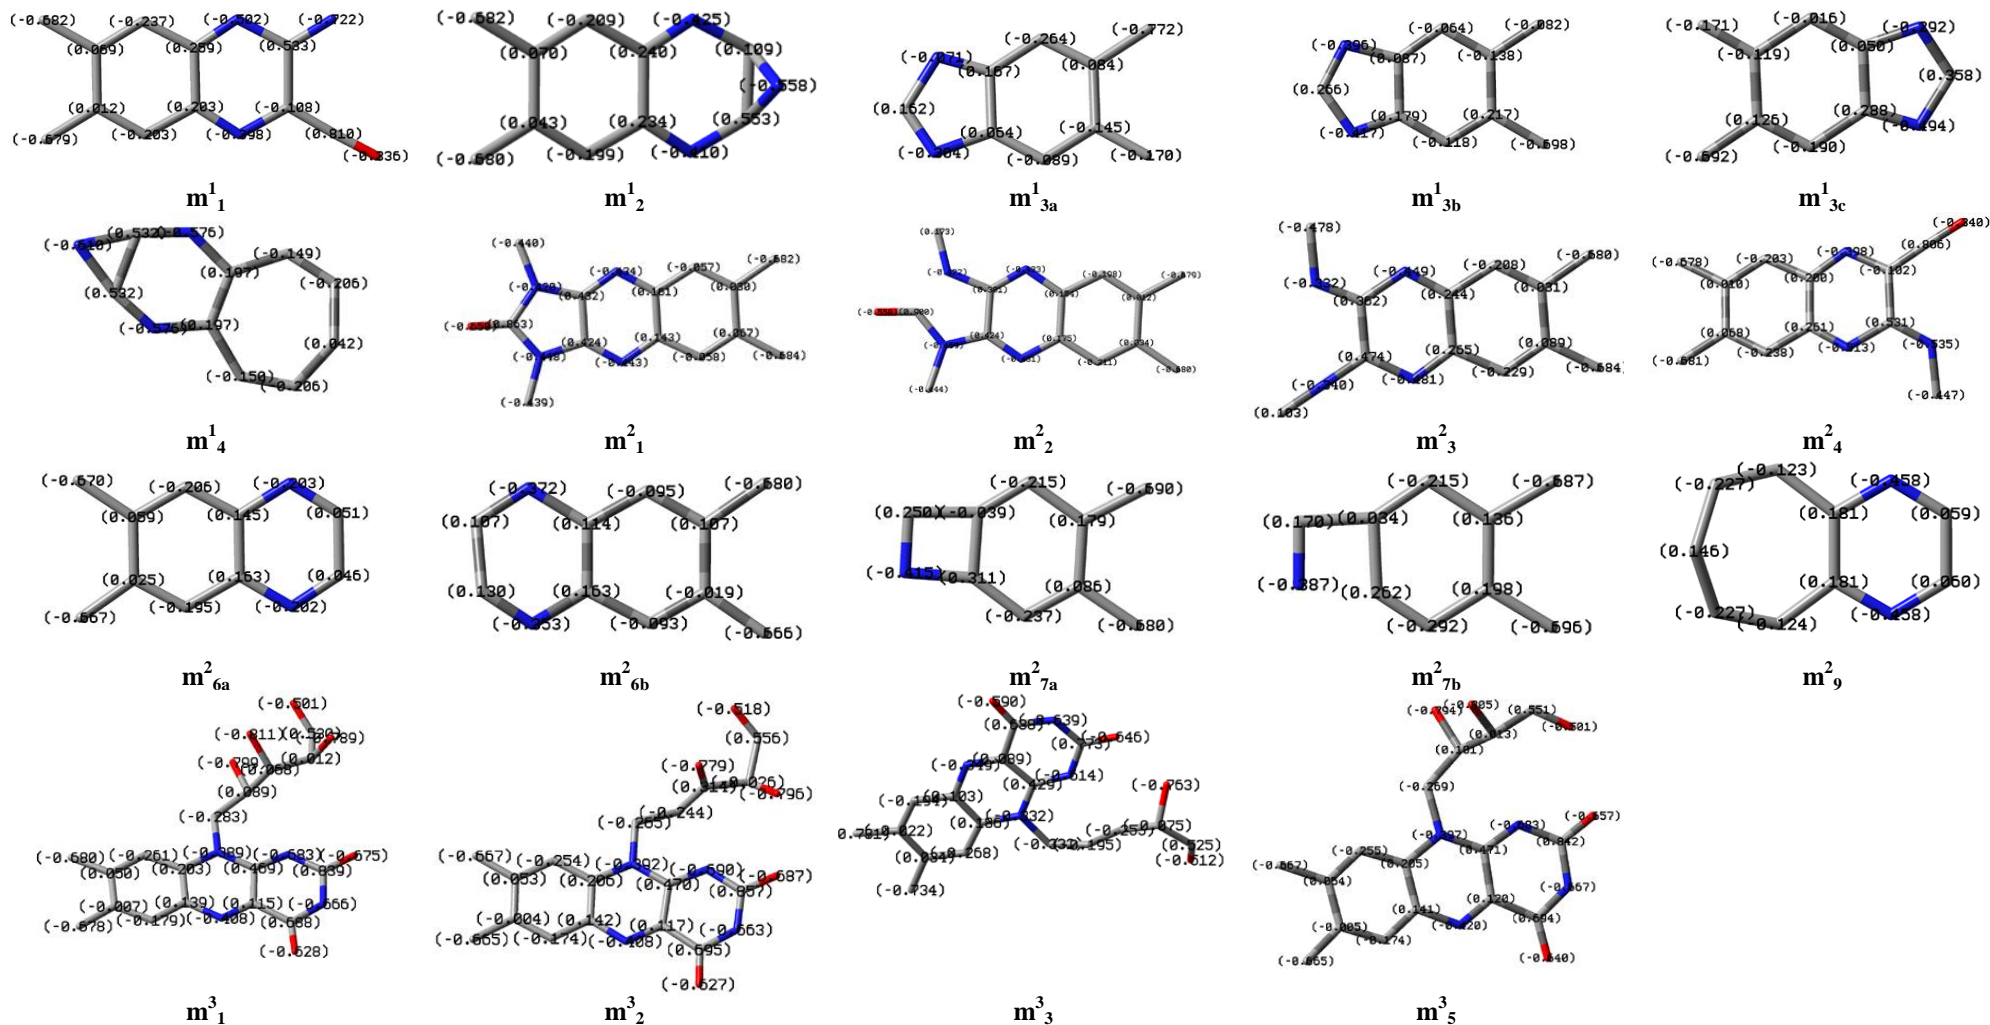

**Scheme S1.** Most stable molecular conformations of the MS fragments the 1–3 (the H-atoms are omitted), Theoretical  $q_X(\text{NBO})$  data, ( $X = \text{N}, \text{O}, \text{and C}$ ), respectively.

**Table S1.** Thermodynamics of the mass spectrometric molecular fragments, proposed in Scheme 1.

|                   |          |            |            |            |            |            |            |
|-------------------|----------|------------|------------|------------|------------|------------|------------|
|                   | $m^1_1$  | $m^1_2$    | $m^1_{3a}$ | $m^1_{3b}$ | $m^1_{3c}$ | $m^1_4$    | $m^2_1$    |
| $\Delta E_{UPSS}$ | -52.07   | -50.05     | -47.01     | -53.86     | -51.99     | -52.80     | -47.58     |
| $\Delta E_{PSS}$  | -56.98   | -52.28     | -48.07     | -59.42     | -54.28     | -56.29     | -52.00     |
| $\Delta E_{SP}$   | 2.68     | 1.17       | 0.61       | 3.29       | 1.25       | 1.92       | 2.51       |
| $\Delta E_E$      | -54.29   | -51.11     | -47.45     | -56.13     | -53.03     | -54.37     | -49.48     |
| $\Delta E^d$      | -27.85   | -24.82     | -20.90     | -21.65     | -21.49     | -22.68     | -33.59     |
| $\Delta E^f$      | 5.19     | 4.86       | 3.60       | 4.07       | 4.20       | 4.83       | 6.43       |
| $\Delta E^t_{NE}$ | 3.41     | 2.44       | 2.56       | 1.91       | 2.47       | 2.01       | 3.72       |
| $\Delta G$        | -50.88   | -48.67     | -44.89     | -54.23     | -50.56     | -52.36     | -45.76     |
| $\Delta E^t_S$    | -664.07  | -549.978   | -456.65    | -456.70    | -456.68    | -509.99    | -797.41    |
|                   | $m^3_1$  | $m^3_2$    | $m^3_3$    | $m^3_5$    | $m^3_6$    | $m^3_7$    | $m^3_8$    |
| $\Delta E_{UPSS}$ | -82.59   | -78.40     | -74.41     | -64.46     | -83.05     | -75.25     | -78.36     |
| $\Delta E_{PSS}$  | -96.54   | -97.72     | -91.99     | -81.51     | -100.39    | -94.06     | -97.93     |
| $\Delta E_{SP}$   | 7.10     | 9.84       | 9.10       | 9.81       | 9.17       | 10.25      | 10.43      |
| $\Delta E_E$      | -89.44   | -87.87     | -82.89     | -71.71     | -91.22     | -83.81     | -87.50     |
| $\Delta E^d$      | -45.19   | -43.64     | -43.34     | -42.17     | -42.43     | -40.55     | -39.44     |
| $\Delta E^f$      | 9.78     | 9.67       | 9.93       | 8.35       | 9.22       | 8.63       | 9.06       |
| $\Delta E^t_{NE}$ | 7.81     | 7.49       | 6.66       | 5.65       | 6.94       | 6.37       | 6.18       |
| $\Delta G$        | -81.63   | -80.38     | -76.23     | -66.05     | -84.28     | -77.44     | -81.32     |
| $\Delta E^t_S$    | -1328.7  | -1252.76   | -1177.38   | -1101.01   | -1214.68   | -1138.26   | -1100.16   |
|                   | $m^2_2$  | $m^2_3$    | $m^2_4$    | $m^2_{6a}$ | $m^2_{6b}$ | $m^2_{7a}$ | $m^2_{7b}$ |
| $\Delta E_{UPSS}$ | -46.01   | -43.50     | -49.32     | -48.14     | -48.28     | -55.40     | -51.30     |
| $\Delta E_{PSS}$  | -49.72   | -44.90     | -54.25     | -51.09     | -49.99     | -59.18     | -54.92     |
| $\Delta E_{SP}$   | 2.02     | 0.75       | 2.65       | 1.78       | 0.88       | 2.05       | 2.19       |
| $\Delta E_E$      | -47.69   | -44.15     | -51.60     | -49.31     | -49.11     | -57.13     | -52.73     |
| $\Delta E^d$      | -31.97   | -30.51     | -30.33     | -24.11     | -24.64     | -22.33     | -20.74     |
| $\Delta E^f$      | 5.66     | 5.66       | 5.87       | 4.70       | 5.18       | 5.70       | 3.84       |
| $\Delta E^t_{NE}$ | 4.87     | 4.57       | 3.82       | 2.62       | 2.25       | 1.59       | 2.02       |
| $\Delta G$        | -42.82   | -39.57     | -47.78     | -46.69     | -46.86     | -55.54     | -50.71     |
| $\Delta E^t_S$    | -796.82  | -683.43    | -703.36    | -549.09    | -496.04    | -402.57    | -402.55    |
|                   | $m^3_9$  | $m^3_{10}$ | $m^3_{11}$ | $m^3_{12}$ | $m^3_{13}$ | $m^3_{14}$ | $m^3_{15}$ |
| $\Delta E_{UPSS}$ | -67.18   | -75.55     | -56.47     | -56.45     | -58.85     | -14.39     | -58.94     |
| $\Delta E_{PSS}$  | -83.53   | -95.14     | -65.83     | -66.35     | -67.52     | -23.00     | -67.22     |
| $\Delta E_{SP}$   | 9.05     | 10.72      | 5.05       | 5.50       | 4.71       | 5.19       | 4.36       |
| $\Delta E_E$      | -74.48   | -84.42     | -60.79     | -60.85     | -62.81     | -17.81     | -62.86     |
| $\Delta E^d$      | -38.23   | -36.31     | -36.09     | -32.66     | -31.03     | -27.64     | -24.35     |
| $\Delta E^f$      | 7.70     | 7.70       | 7.42       | 5.23       | 5.66       | 4.72       | 5.43       |
| $\Delta E^t_{NE}$ | 5.16     | 4.94       | 4.24       | 5.58       | 3.61       | 3.02       | 5.68       |
| $\Delta G$        | -69.32   | -79.48     | -56.55     | -55.28     | -59.20     | -14.79     | -57.18     |
| $\Delta E^t_S$    | -1023.74 | -985.66    | -948.58    | -909.44    | -832.04    | -717.64    | -550.71    |

$\Delta G$  – free Gibbs energy of the system;  $\Delta E_{NE}^t$  - total non-electrostatic energy;  $\Delta E^r$  - repulsion energy;  $\Delta E^d$  - dispersion energy;  $\Delta E_E$  - total electrostatic energy;  $\Delta E_{SP}$  - Solute Polarization;  $\Delta E_{PSS}$  – polar solute-solvent energy;  $\Delta E_{UPSS}$  – Unpolar-Solute-Solvent energy;  $\Delta E_S^t$  – total free energy in solution; [kcal/mol].

---
